# Supplementary material
Source: publisher site journal article supplement (https://www.dovepress.com/article/316186)
Supplement: Supplementary file 1 [file get_supplementary_file.php]

# **Online Supplementary materials**

## **Supplementary Methods**

Patient Questionnaire

Patients were considered to have long COVID if they report either self-diagnosis, clinician diagnosis, or test confirmed COVID-19 and reported any of the following symptoms lasting at least 4 weeks. Questions assessing COVID-19 status and the presence and duration of symptoms are indicated below.

| **1** | Have you had any of these symptoms of COVID-19 since January 2020? *(Tick all that apply)* |
| --- | --- |
|  | [ ] No, I have not had any symptoms  [ ] Fever or high temperature  [ ] Persistent dry cough  [ ] Loss or change of smell or taste  [ ] Shortness of breath  [ ] Loss of appetite  [ ] Chest pain  [ ] Fatigue or tiredness  [ ] Aches and pains  [ ] Headache  [ ] Abdominal pain  [ ] Diarrhoea  [ ] Confusion or disorientation  **If any symptom is selected** → 1.1, 1.2 |
| **1.1** | When did your symptoms start? [ date ] |
| **1.2** | When did your symptoms stop? [ date ] |

| **2** | Do you believe that you had COVID-19 infection? |
| --- | --- |
|  | [ ] Yes → 3, 8  [ ] No → 5 |

| **3** | Have you been diagnosed with COVID-19 or told by a healthcare professional that you may have COVID-19? |
| --- | --- |
|  | [ ] Yes → 4  [ ] No → 5 |

| **5** | Have you been tested for COVID-19? |
| --- | --- |
|  | [ ] Yes → 6  [ ] No → 11 |

| **7** | What were the results of your COVID-19 test? |
| --- | --- |
|  | [ ] At least one of my tests was positive  [ ] None of my tests were positive  [ ] I am still waiting for my results |

Questions to assess the demographic and clinical characteristics which potentially predict long COVID are listed below.

| **8** | What kind of medical attention did you seek for COVID-19 infection or symptoms? *(Tick all that apply)* |
| --- | --- |
|  | [ ] No, I did not seek any medical attention  [ ] Contacted NHS 111 by phone or online  [ ] Consulted GP/practice nurse over the phone or online  [ ] Consulted GP/practice nurse face-to-face  [ ] Visited Accident and Emergency → 8.1  [ ] Admitted to hospital → 8.1  [ ] Admitted to intensive or critical care → 8.1  [ ] Other [ please specify ] |

| **13.1** | Which one of the following best describes your level of fitness? |
| --- | --- |
|  | [ ] Fit and well (you have no active medical problems, and you exercise occasionally or regularly)  [ ] Managing well (you have medical problems that limit how active you are, but you don't need help with daily activities)  [ ] Frail (you have medical problems that limit how active you are, and you need help with daily activities and personal care) |

| **17** | Which of the following best describes your ethnicity? *(Tick all that apply)* |
| --- | --- |
|  | [ ] Asian / Asian British  [ ] Black / Black British  [ ] Mixed race - White and Black/Black British  [ ] Mixed race - other  [ ] White - British, Irish, other  [ ] Chinese / Chinese British  [ ] Hispanic or Latino or Spanish origin  [ ] Middle Eastern / Middle Eastern British  [ ] Other [ please specify ]  [ ] Unknown / Prefer not to say |

| **19** | Do you have any of the following health problems or conditions? *(Tick all that apply)* |
| --- | --- |
|  | [ ] Asthma → 19.1 then 20  [ ] COPD, bronchitis or emphysema → 19.1 then 20  [ ] Diabetes → 19.1 then 26  [ ] Heart disease or heart failure → 19.1 then 26  [ ] Kidney disease → 19.1 then 26 |

## **Supplementary Results**

**Supplementary Table 1. Univariable model for risk predictors of long COVID (4 weeks definition)**

| Variable | | OR (95% CI) |
| --- | --- | --- |
| COVID-19 Status | Test confirmed positive | *Reference* |
| Clinical diagnosis without test confirmation | 1.98 (1.47 - 2. 68)a |
| Self-diagnosed without test confirmation | 0.15 (0.11 - 0.21) a |
| Hospital Visit for COVID-19 Symptoms or Infection | None | *Reference* |
| Visited A & E | 5.29 (3.11 - 8.77)a |
| Admitted to hospital | 5.79 (3.38 – 9.70)a |
| Admitted to intensive or critical care | 4.07 (1.30 – 10.88)a |
| Underlying chronic co-morbid diseases | No disease | *Reference* |
| Asthma | 1.22 (0.91 - 1.60) |
| COPD, bronchitis or emphysema | 3.13 (1.89 - 5.00)a |
| Diabetes | 1.29 (0.98 - 1.68) |
| Ischemic heart disease or heart failure | 1.89 (1.21 - 2.84)a |
| Kidney disease | 1.09 (0.54 - 1.97) |
| Any of the above diseases | 1.42 (1.12 - 1.80)a |
| Age | 18 – 40 years | *Reference* |
| ≥40 years | 1.51 (1.12 - 2.08)a |
| Sex | Male | *Reference* |
| Female | 1.45 (1.12 - 1.89)a |
| BMI | <30 kg/m2 | *Reference* |
| ≥30 kg/m2 | 1.23 (0.96 - 1.56) |
| Smoking status | Non-Smoker | *Reference* |
| Ex-Smoker | 1.13 (0.88 - 1.46) |
| Current Smoker | 1.08 (0.73 - 1.57) |
| Unknown | 0.78 (0.27 - 1.80) |
| Frailty | No reported frailty | *Reference* |
| Reported frailty | 2.51 (1.49 - 4.04)a |
| aStatistically significant at p<0.005. | | |

**Supplementary Table 2. Sensitivity analysis – Univariable model for risk predictor for long COVID (12 weeks definition)**

| Variable | | OR (95% CI) |
| --- | --- | --- |
| COVID-19 Status | Test confirmed positive | *Reference* |
| Clinical diagnosis without test confirmation | 2.82 (2.03 - 3.95)a |
| Self-diagnosed without test confirmation | 0.20 (0.14 - 0.29)a |
| Hospital Visit for COVID-19 Symptoms or Infection | None | *Reference* |
| Visited A & E | 6.35 (3.69 - 10.61)a |
| Admitted to hospital | 6.03 (3.43 - 10.26)a |
| Admitted to intensive or critical care | 1.69 (0.27 - 6.01) |
| Underlying chronic co-morbid diseases | No disease | *Reference* |
| Asthma | 1.30 (0.95 - 1.75) |
| COPD, bronchitis or emphysema | 2.47 (1.38 - 4.20)a |
| Diabetes | 1.22 (0.90 - 1.65) |
| Ischemic heart disease or heart failure | 2.22 (1.40 - 3.39)a |
| Kidney disease | 0.83 (0.35 - 1.69) |
| Combined diseases | 1.23 (0.95 - 1.60) |
| Age | 18 – 40 years | *Reference* |
| ≥40 years | 1.54 (1.10 - 2.20)a |
| Sex | Male | *Reference* |
| Female | 1.58 (1.19 - 2.14)a |
| BMI | <30 kg/m2 | *Reference* |
| ≥30 kg/m2 | 1.23 (0.95 - 1.61) |
| Smoking status | Non-Smoker | *Reference* |
| Ex-Smoker | 1.03 (0.78 - 1.36) |
| Current Smoker | 1.01 (0.65 - 1.51) |
| Unknown | 0.74 (0.22 - 1.84) |
| Frailty | No reported frailty | *Reference* |
| Reported frailty | 2.27 (1.26 - 3.82)a |
| aStatistically significant at p<0.005. | | |

**Supplementary Table 3. Combined condition multivariable model for risk predictors for long COVID**

| Variable | | Adjusted OR (95% CI)*a |
| --- | --- | --- |
| COVID-19 Status | Test confirmed positive | *Reference* |
| Clinical diagnosis without test confirmation | 2.01 (1.46 - 2.77)b |
| Self-diagnosed without test confirmation | 0.16 (0.11 - 0.22)b |
| Hospital Visit for COVID-19 Symptoms or Infection | None | *Reference* |
| Visited A & E | 4.32 (2.33 - 7.86)b |
| Admitted to hospital | 3.30 (1.81 - 5.91)b |
| Admitted to intensive or critical care | 1.42 (0.43 - 4.05) |
| Underlying chronic co-morbid diseases | No disease | *Reference* |
| Asthma, COPD, bronchitis or emphysema, Diabetes, Ischemic heart disease or heart failure, or Kidney impairment | 1.16 (0.88 - 1.52) |
| Age | 18 – 40 years | *Reference* |
| ≥40 years | 1.54 (1.08 - 2.23)b |
| Sex | Male | *Reference* |
| Female | 1.36 (1.02 - 1.83)b |
| BMI | <30 kg/m2 | *Reference* |
| ≥30 kg/m2 | 1.06 (0.81 - 1.38) |
| Smoking status | Non-Smoker | *Reference* |
| Ex-Smoker | 1.17 (0.88 - 1.56) |
| Current Smoker | 1.49 (0.96 - 2.28) |
| Unknown | 0.74 (0.12 - 2.61) |
| Frailty | No reported frailty | *Reference* |
| Reported frailty | 2.65 (1.46 - 4.65)b |
| aAdjusted for all demographic variables, hospital visits for COVID-19, frailty, chronic co-morbid conditions, and COVID-19 status; bStatistically significant at p<0.005. | | |

**Supplementary Table 4. Sensitivity analysis - Split condition multivariable model for risk predictors for long COVID (12 weeks definition)**

| Variable | | Adjusted OR (95% CI)a |
| --- | --- | --- |
| COVID-19 Status | Test confirmed positive | *Reference* |
| Clinical diagnosis without test confirmation | 2.71 (1.91 - 3.88)b |
| Self-diagnosed without test confirmation | 0.20 (0.14 - 0.29)b |
| Hospital Visit for COVID-19 Symptoms or Infection | None | *Reference* |
| Visited A & E | 5.06 (2.69 - 9.32)b |
| Admitted to hospital | 3.37 (1.80 - 6.18)b |
| Admitted to intensive or critical care | 0.58 (0.09 - 2.22) |
| Underlying chronic co-morbid diseases | No disease | *Reference* |
| Asthma | 1.12 (0.79 - 1.58) |
| COPD, bronchitis or emphysema | 1.13 (0.56 - 2.15) |
| Diabetes | 1.03 (0.72 - 1.44) |
| Ischemic heart disease or heart failure | 1.72 (1.00 - 2.87)b |
| Kidney disease | 0.83 (0.30 - 1.90) |
| Age | 18 – 40 years | *Reference* |
| ≥40 years | 1.56 (1.05 - 2.35)b |
| Sex | Male | *Reference* |
| Female | 1.47 (1.07 - 2.05) |
| BMI | <30 kg/m2 | *Reference* |
| ≥30 kg/m2 | 1.06 (0.79 - 1.42) |
| Smoking status | Non-Smoker | *Reference* |
| Ex-Smoker | 1.03 (0.75 - 1.41) |
| Current Smoker | 1.29 (0.78 - 2.07) |
| Unknown | 0.95 (0.15 - 3.40) |
| Frailty | No reported frailty | *Reference* |
| Reported frailty | 2.21 (1.12 - 4.15)b |
| aAdjusted for all demographic variables, hospital visits for COVID-19, frailty, chronic co-morbid conditions, and COVID-19 status; bStatistically significant at p<0.005. | | |

**Supplementary Table 5. Sensitivity analysis - Combined condition multivariable model for risk predictors for long COVID (12 weeks definition)**

| Variable | | Adjusted OR (95% CI)* |
| --- | --- | --- |
| COVID-19 Status | Test confirmed positive | *Reference* |
| Clinical diagnosis without test confirmation | 2.76 (1.95 - 3.94)b |
| Self-diagnosed without test confirmation | 0.20 (0.14 - 0.29)b |
| Hospital Visit for COVID-19 Symptoms or Infection | None | *Reference* |
| Visited A & E | 5.11 (2.73 - 9.40)b |
| Admitted to hospital | 3.61 (1.88 - 6.40)b |
| Admitted to intensive or critical care | 0.64 (0.10 - 2.41) |
| Underlying chronic co-morbid diseases | No disease | *Reference* |
| Asthma, COPD, bronchitis or emphysema, Diabetes, Ischemic heart disease or heart failure, or Kidney impairment | 1.21 (0.90 - 1.63) |
| Age | 18 – 40 years | *Reference* |
| ≥40 years | 1.59 (1.08 - 2.40)b |
| Sex | Male | *Reference* |
| Female | 1.46 (1.06 - 2.03)b |
| BMI | <30 kg/m2 | *Reference* |
| ≥30 kg/m2 | 1.06 (0.79 - 1.42) |
| Smoking status | Non-Smoker | *Reference* |
| Ex-Smoker | 1.04 (0.76 - 1.42) |
| Current Smoker | 1.33 (0.81 - 2.12) |
| Unknown | 0.95 (0.15 - 3.38) |
| Frailty | No reported frailty | *Reference* |
| Reported frailty | 2.32 (1.20 - 4.29)b |
| aAdjusted for all demographic variables, hospital visits for COVID-19, frailty, chronic co-morbid conditions, and COVID-19 status; bStatistically significant at p<0.005. | | |

**Supplementary Figure 1. Presence of symptoms in long COVID patients (12 weeks definition)**
